# Supplementary material for: Anomalous dielectric behaviour during the monoclinic to tetragonal phase transition in La(Nb0.9V0.1)O4
Source: Royal Society of Chemistry journal article supplement (doi:10.1039/d0qi00981d), 2020-10-27
Supplement: d0qi00981d1.pdf [file d0qi00981d1.pdf]

## Supporting Information

### Anomalous Dielectric Behaviour at the Monoclinic to Tetragonal Phase Transition in $\text{La}(\text{Nb}_{0.9}\text{V}_{0.1})\text{O}_4$

Di Zhou,<sup>\*a</sup> Huan-Huan Guo,<sup>a</sup> Mao-Sen Fu,<sup>b</sup> Xiao-Gang Yao,<sup>c</sup> Hui-Xing Lin,<sup>c</sup> Wen-Feng Liu,<sup>d</sup>

Li-Xia Pang,<sup>f</sup> Charanjeet Singh,<sup>g</sup> Sergei Trukhanov<sup>h,i,j</sup> and Alex Trukhanov<sup>h,i,j</sup> & Ian M.

Reaney<sup>\*e</sup>

Fig. S1a shows a diffraction contrast transmission electron micrograph (TEM) of a grain of monoclinic  $\text{La}(\text{Nb}_{0.9}\text{V}_{0.1})\text{O}_4$  at room temperature which exhibits a ferroelastic domain structure with widths from 20 to 50 nm, similar to that of pure  $\text{LaNbO}_4$ .<sup>1</sup> Fig. S1b-d show high resolution transmission electron microscopy (HRTEM) images and inset selected area electron diffraction patterns (SAED) from  $\text{La}(\text{Nb}_{0.9}\text{V}_{0.1})\text{O}_4$  ceramics recorded along the  $[012]$ ,  $[010]$  and  $[21\bar{4}]$  zone axes, respectively. The crystal plane spacing in the SAED patterns is consistent with that in the HRTEM images, and agrees well with the refined lattice parameters of  $\text{La}(\text{Nb}_{0.9}\text{V}_{0.1})\text{O}_4$  sample at room temperature. The results of XRD, HRTEM and SAED patterns are therefore, in good agreement, confirming that the  $\text{La}(\text{Nb}_{0.9}\text{V}_{0.1})\text{O}_4$  ceramics at room temperature are monoclinic with a space group  $I2/c$  (No. 15).

---

<sup>\*</sup>Corresponding author E-mail address: zhoudi1220@gmail.com (Di Zhou) & i.m.reaney@sheffield.ac.uk (Ian M. Reaney)

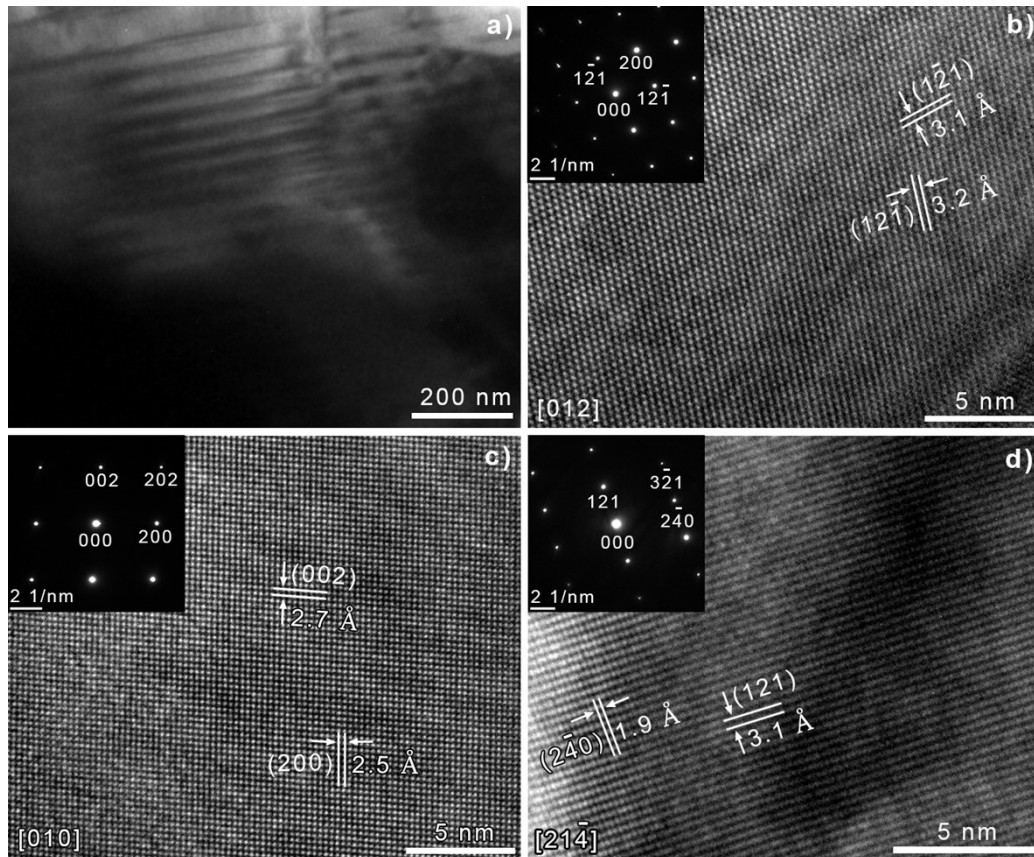

**Fig. S1.** (a) Diffraction contrast TEM image of ferroelastic domains of La(Nb<sub>0.9</sub>V<sub>0.1</sub>)O<sub>4</sub> at room temperature. (b-d) HRTEM image and the corresponding SAED of La(Nb<sub>0.9</sub>V<sub>0.1</sub>)O<sub>4</sub> ceramic viewed along the [012], [010] and [21 $\bar{4}$ ] zone axes at room temperature, respectively.

## Reference

- 1 L. Jian and C. M. Wayman, Domain boundary and domain switching in a ceramic rare-earth orthoniobate LaNbO<sub>4</sub>, *J. Am. Ceram. Soc.*, 1996, **79**, 1642-1648.
